# Supplementary material for: Input-specific modulation of murine nucleus accumbens differentially regulates hedonic feeding
Source: PubMed Central journal article supplement (PMC8035198; doi:10.1038/s41467-021-22430-7), 2021-04-09
Supplement: 41467_2021_22430_MOESM1_ESM.pdf [file 41467_2021_22430_MOESM1_ESM.pdf]

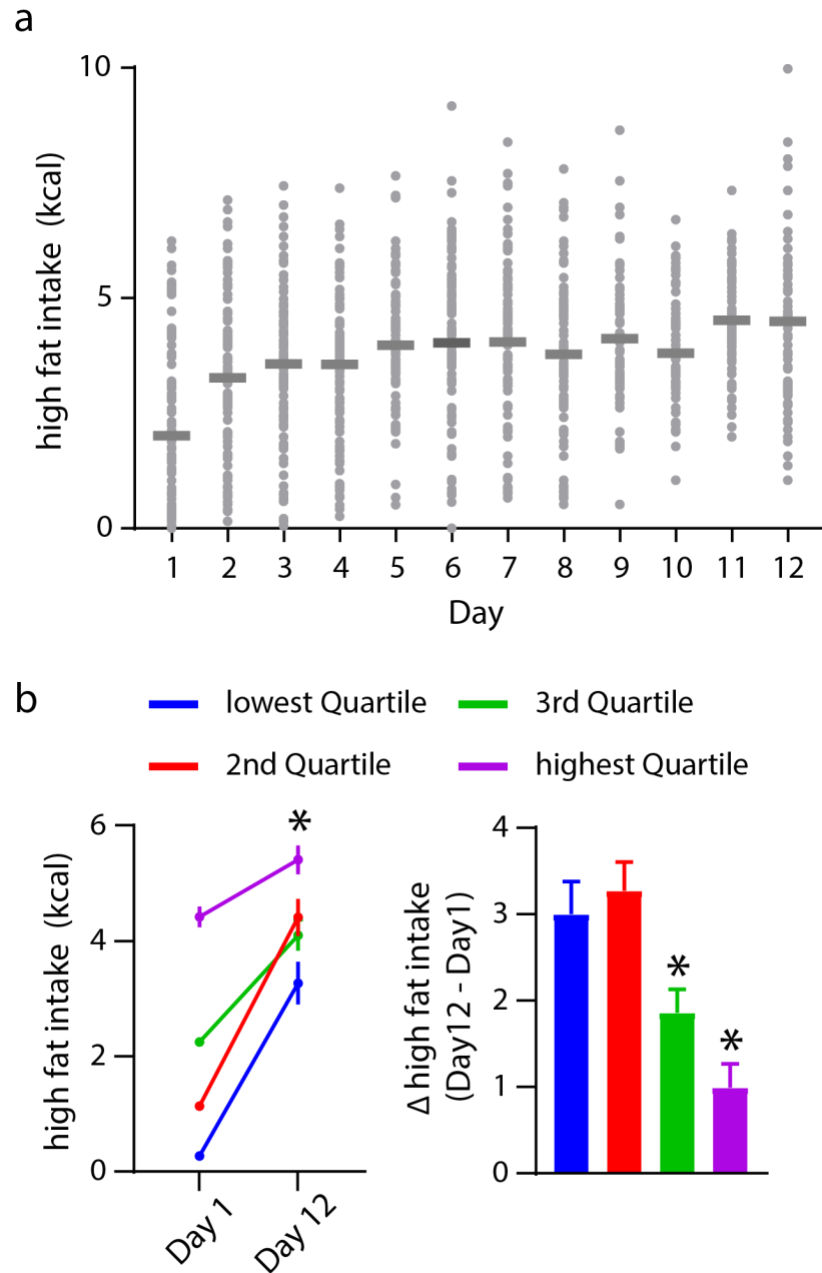

**Supplementary Figure 1. Variability in high fat intake during daily one hour exposure.**

**a**, Individual data points and mean distribution of high fat intake per exposure across days 1-12. **b**, High fat intake per exposure for lowest to highest quartile for day 1 and day 12 (left;  $F_{3,108} = 11.1$ ,  $P = 0.0001$ ,  $n = 28$  mice/group) and the difference in intake levels between day 12 and day 1 (right;  $F_{3,108} = 11.07$ ,  $P = 0.0001$ ,  $n = 28$  mice/group). Data are mean  $\pm$  s.e.m. \* $P < 0.05$ , one-way ANOVA with Dunnett's multiple comparison post hoc test. Source data are provided as a Source Data file.

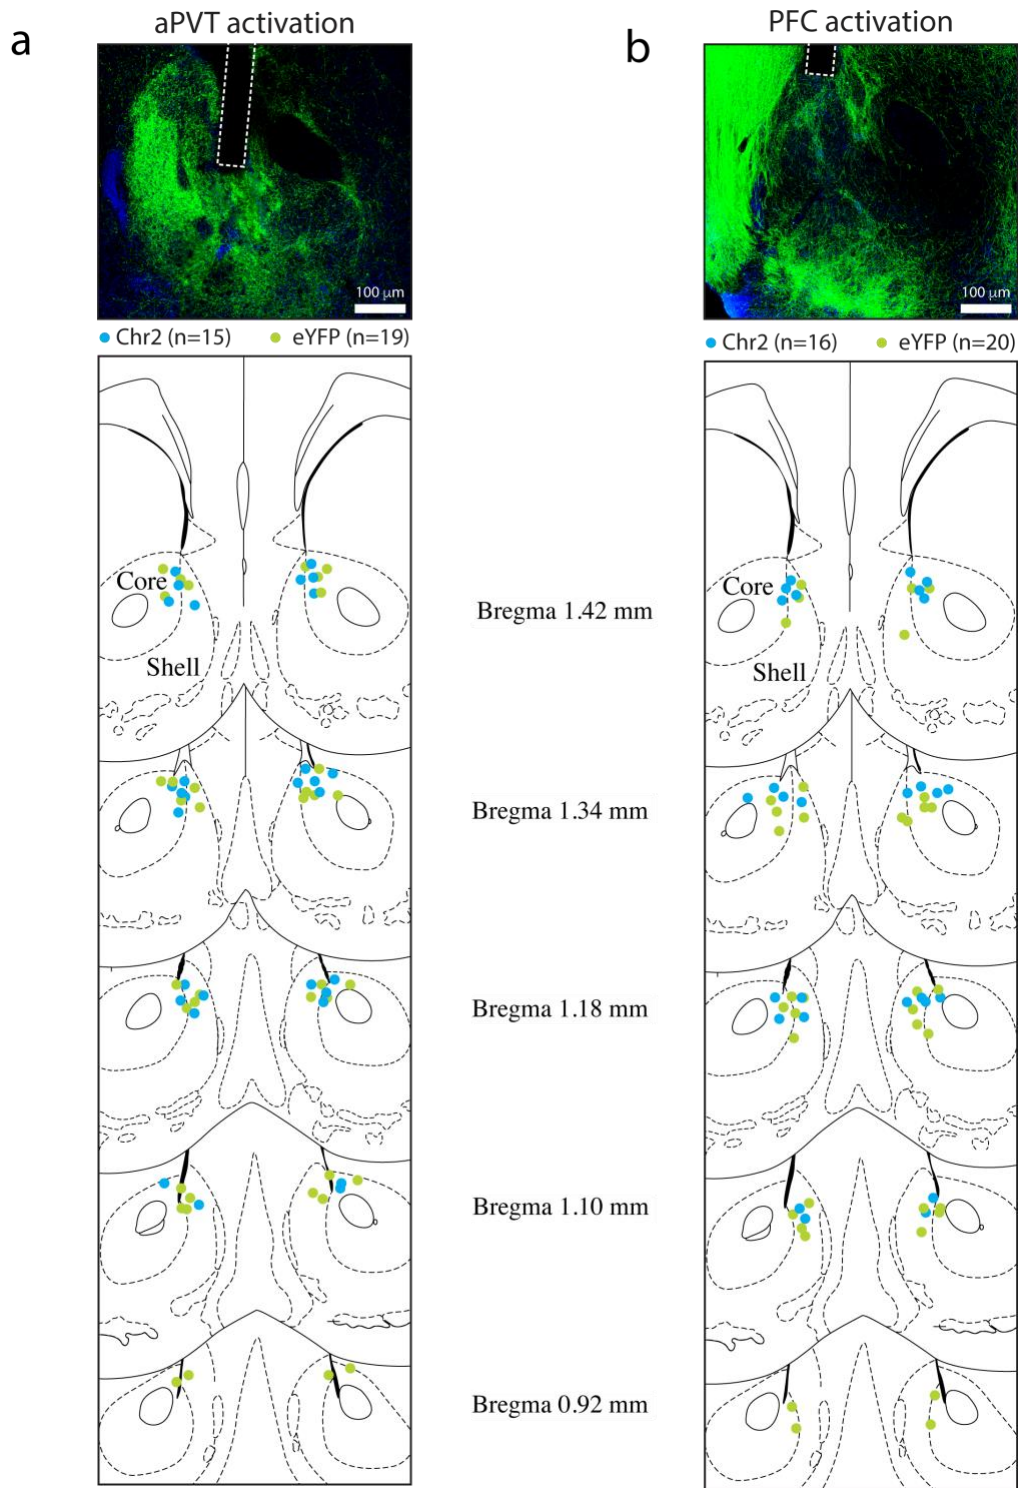

**Supplementary Figure 2. Summary of histological assessment of optic fiber tip placement for activation studies. a,** Representative images of transgene (green) expression and fiber optic placement for aPVT activation experiments (top); summary of optic fiber tip placement (blue = Chr2; green = eYFP). **b,** Representative images of transgene (green) expression and fiber optic placement for PFC activation experiments (top); summary of optic fiber tip placement (blue = Chr2; green = eYFP).

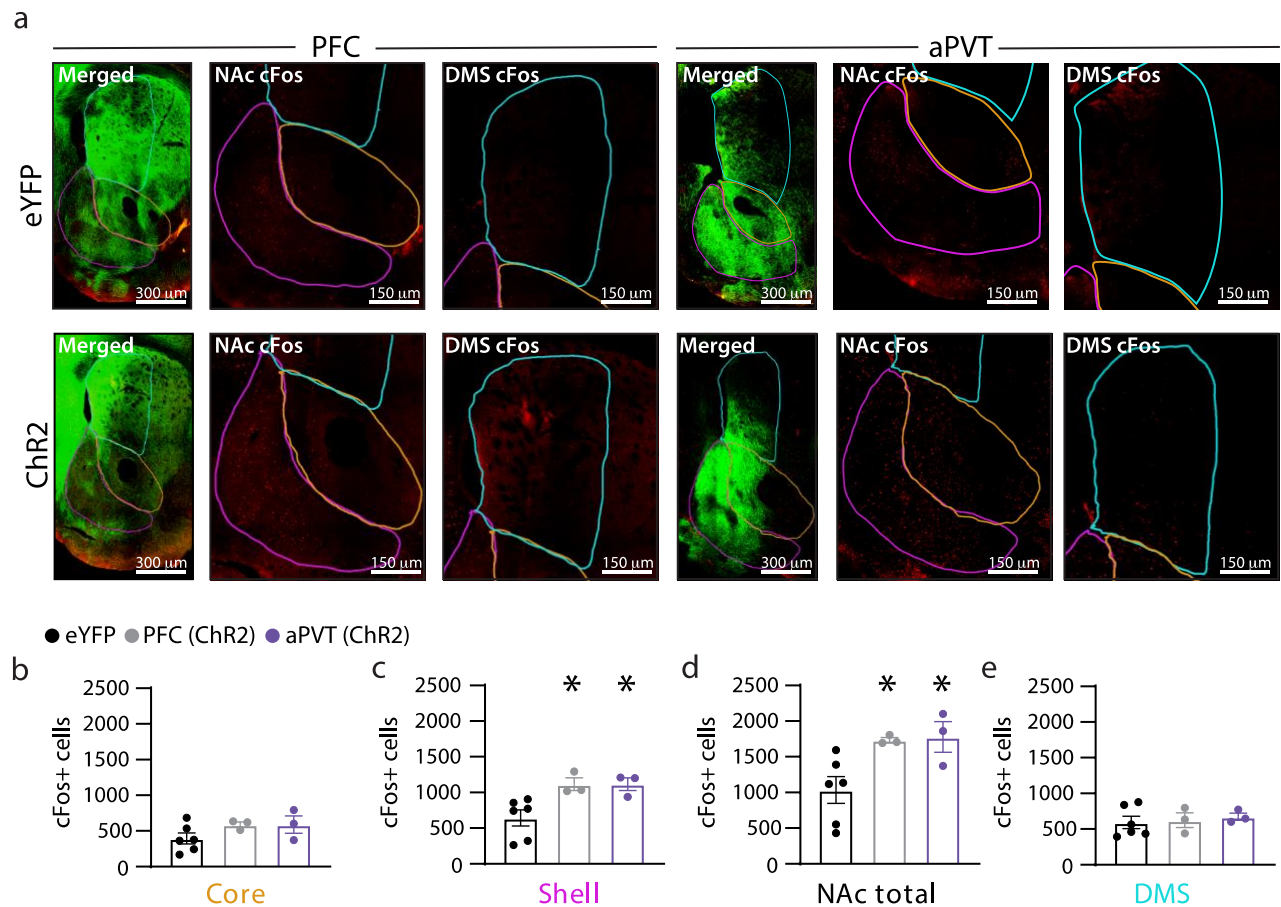

**Supplementary Figure 3. Activation of distinct NAc glutamatergic inputs selectively increase cFos levels in the NAc.**

**a**, Representative images of transgene (green) and cFos (red) (left most image), and magnified cFos only (middle, right) expression patterns for PFC-eYFP control (top-left), PFC-ChR2 (bottom-left), and aPVT-eYFP (top-right), aPVT-ChR2 (bottom-right) mice. **b-e**, Quantification of cFos+ cells in the NAc core (**b**:  $n = 6,3$  mice/group), shell (**c**:  $F_{2,9} = 6.25$ ,  $P = 0.02$ ,  $n = 6,3$  mice/group), total NAc (**d**:  $F_{2,9} = 5.23$ ,  $P = 0.03$ ,  $n = 6,3$  mice/group), and medial dorsal striatum (DS) (**e**:  $n = 6,3$  mice/group). Data are mean  $\pm$  s.e.m. \* $P < 0.05$ , one-way ANOVA with Tukey's multiple comparison post hoc test. Source data are provided as a Source Data file.

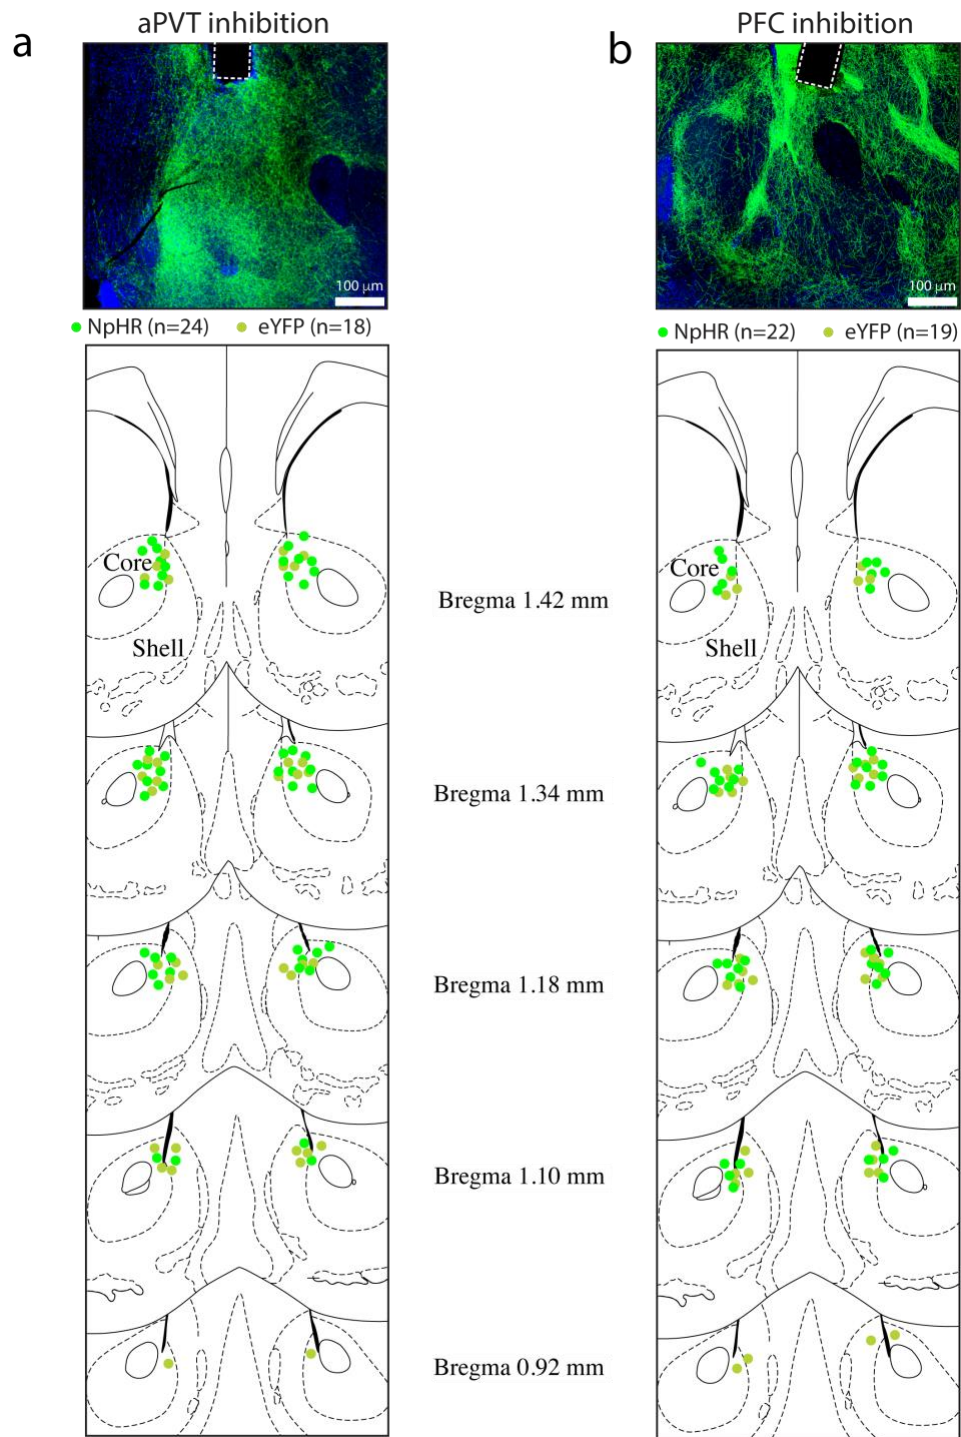

**Supplementary Figure 4. Summary of histological assessment of optic fiber tip placement for inhibition studies.** **a**, Representative images of transgene (green) expression and fiber optic placement for aPVT inhibition experiments (top); summary of optic fiber tip placement (bright green = NpHR; yellow-green = eYFP). **b**, Representative images of transgene (green) expression and fiber optic placement for PFC inhibition experiments (top); summary of optic fiber tip placement (bright green = NpHR; yellow-green = eYFP).

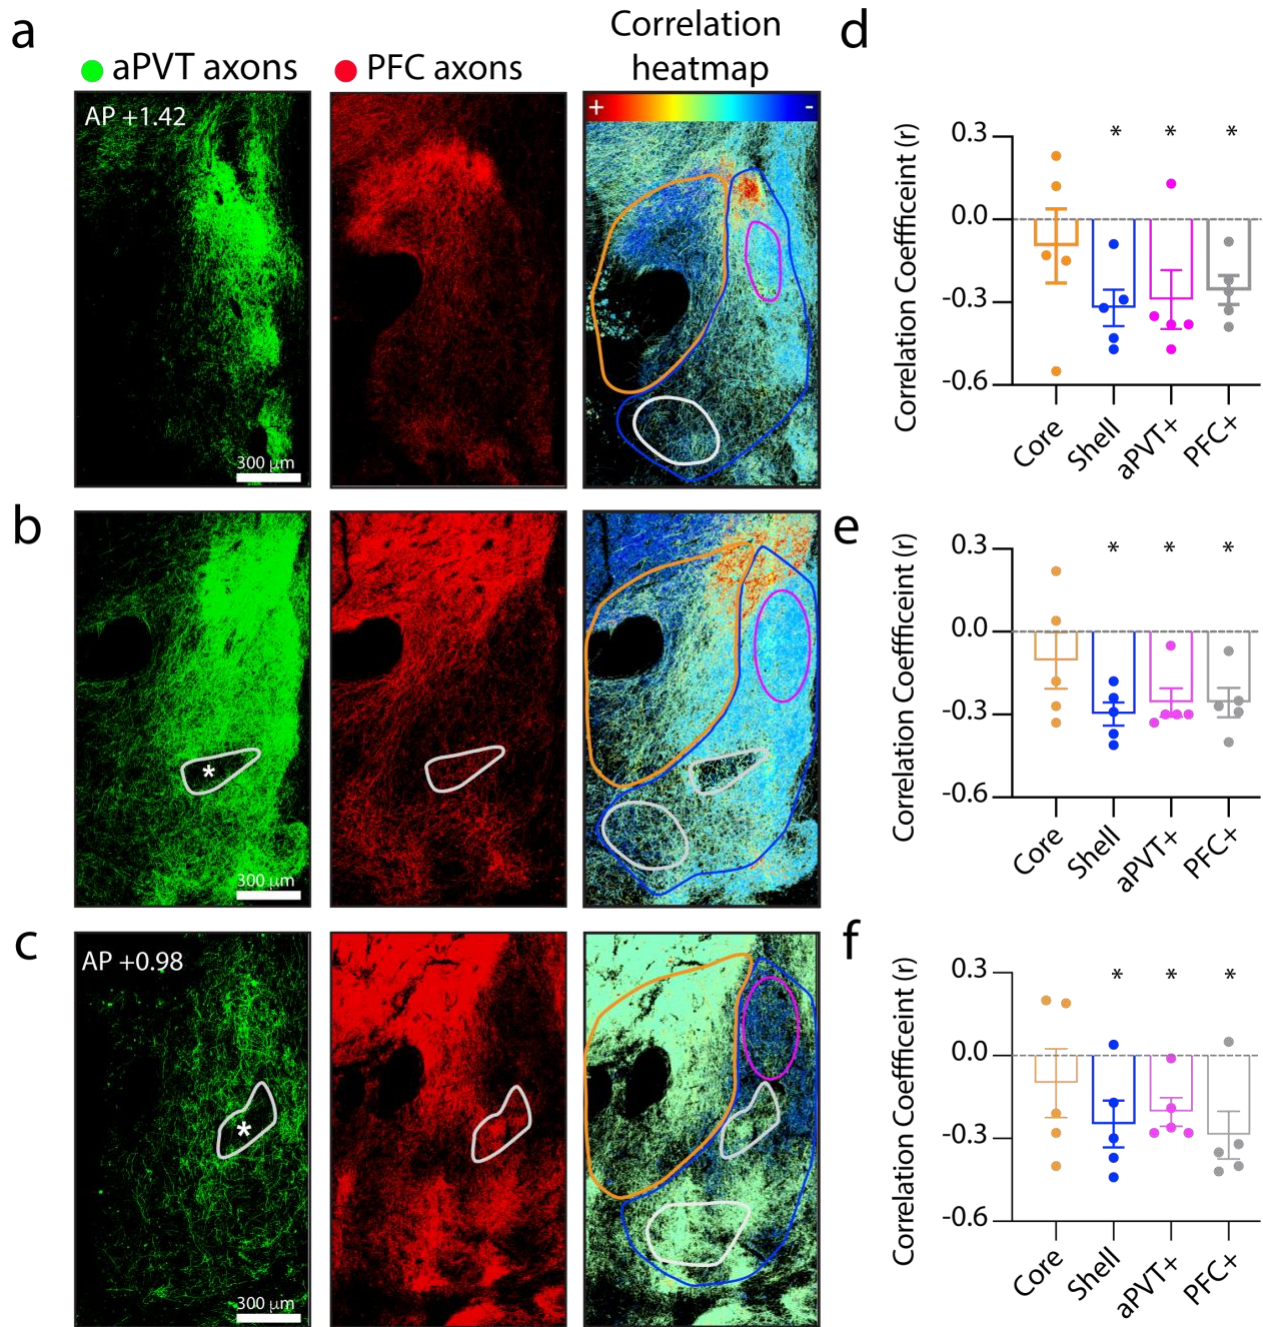

**Supplementary Figure 5. Differential Innervation of NAc subregions by aPVT and PFC inputs.**

Representative images (from left to right) of aPVT axons, PFC axons, and correlation heatmap in NAc subregions at **a**) AP +1.42, **b**) AP +1.18, **c**) AP +0.98. **d-f**, Quantification of input colocalization with correlation coefficient (**d**: Core –  $t = 0.08$ ; Shell –  $t = 2.99$ ,  $P = 0.008$ ; aPVT+ –  $t = 3.98$ ,  $P = 0.02$ ; PFC+ –  $t = 3.37$ ,  $P = 0.03$  **e**: Core –  $t = 0.02$ ; Shell –  $t = 7.12$ ,  $P = 0.002$ ; aPVT+ –  $t = 4.94$ ,  $P = 0.008$ ; PFC+ –  $t = 4.81$ ,  $P = 0.009$  **f**: Core –  $t = 0.80$ ; Shell –  $t = 2.93$ ,  $P = 0.04$ ; aPVT+ –  $t = 3.98$ ,  $P = 0.02$ ; PFC+ –  $t = 3.34$ ,  $P = 0.03$ ;  $n = 5$  mice/group) of NAc subregions for identified AP sections in a-c. Data are mean  $\pm$  s.e.m. \* $P < 0.05$ , one-way sample  $t$  and Wilcoxon test. Source data are provided as a Source Data file.

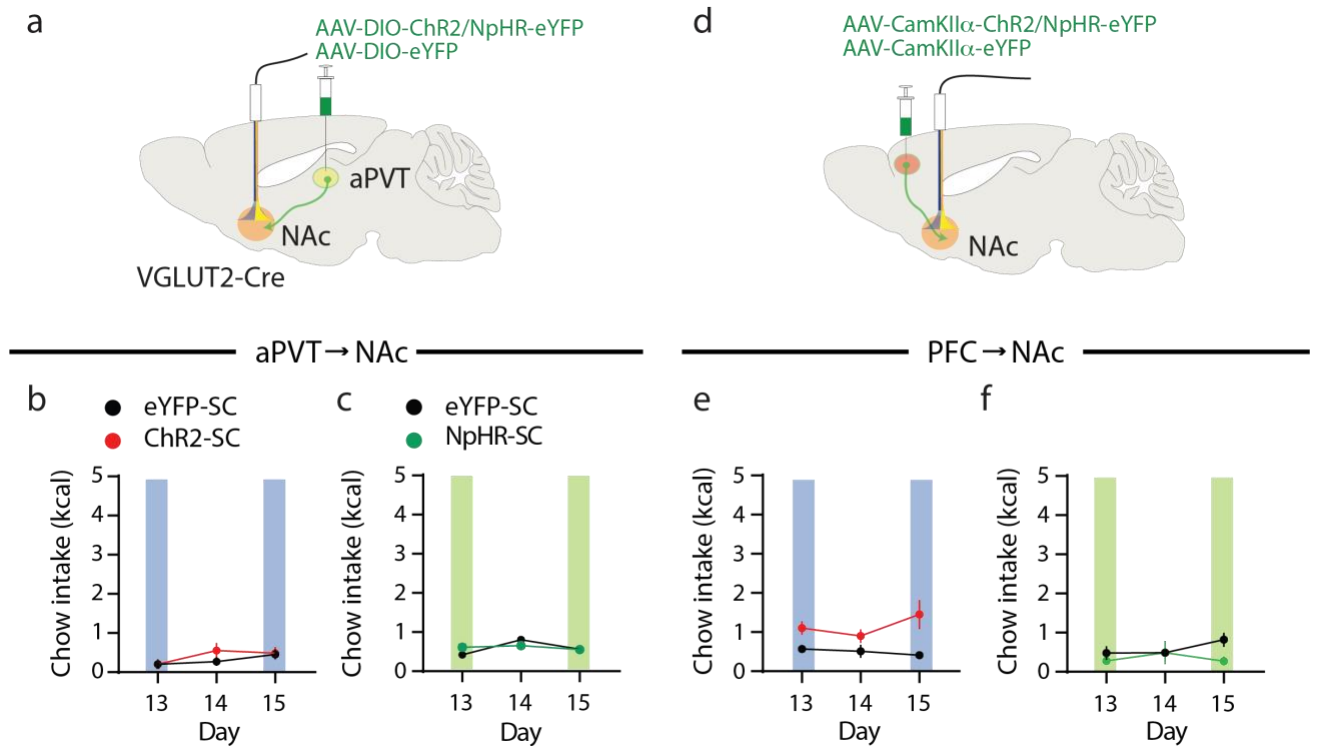

**Supplementary Figure 6. Manipulation of distinct NAc glutamatergic input activity does not affect chow intake.**

**a**, Schematic of viral injection and ferrule implant for aPVT input stimulation. **b**, Quantification of chow intake during expression period (n = 5,9 mice/group) in eYFP control (black) and ChR2 expressing (red) mice. Blue bars signify blue light stimulation. **c**, Quantification of chow intake during expression period (n = 12,8 mice/group) in eYFP control (black) and NpHR expressing (green) mice. Green bars signify green light stimulation. **d**, Schematic of viral injection and ferrule implant for PFC input stimulation. **e**, Quantification of chow intake during expression period (n = 5,6 mice/group) in eYFP control (black) and ChR2 expressing (red) mice. **f**, Quantification of chow intake during expression period (P > 0.05, n = 5 mice/group) in eYFP control (black) and NpHR expressing (green) mice. Data are mean  $\pm$  s.e.m. two-way ANOVA with Sidak's multiple comparison post hoc test. Source data are provided as a Source Data file.

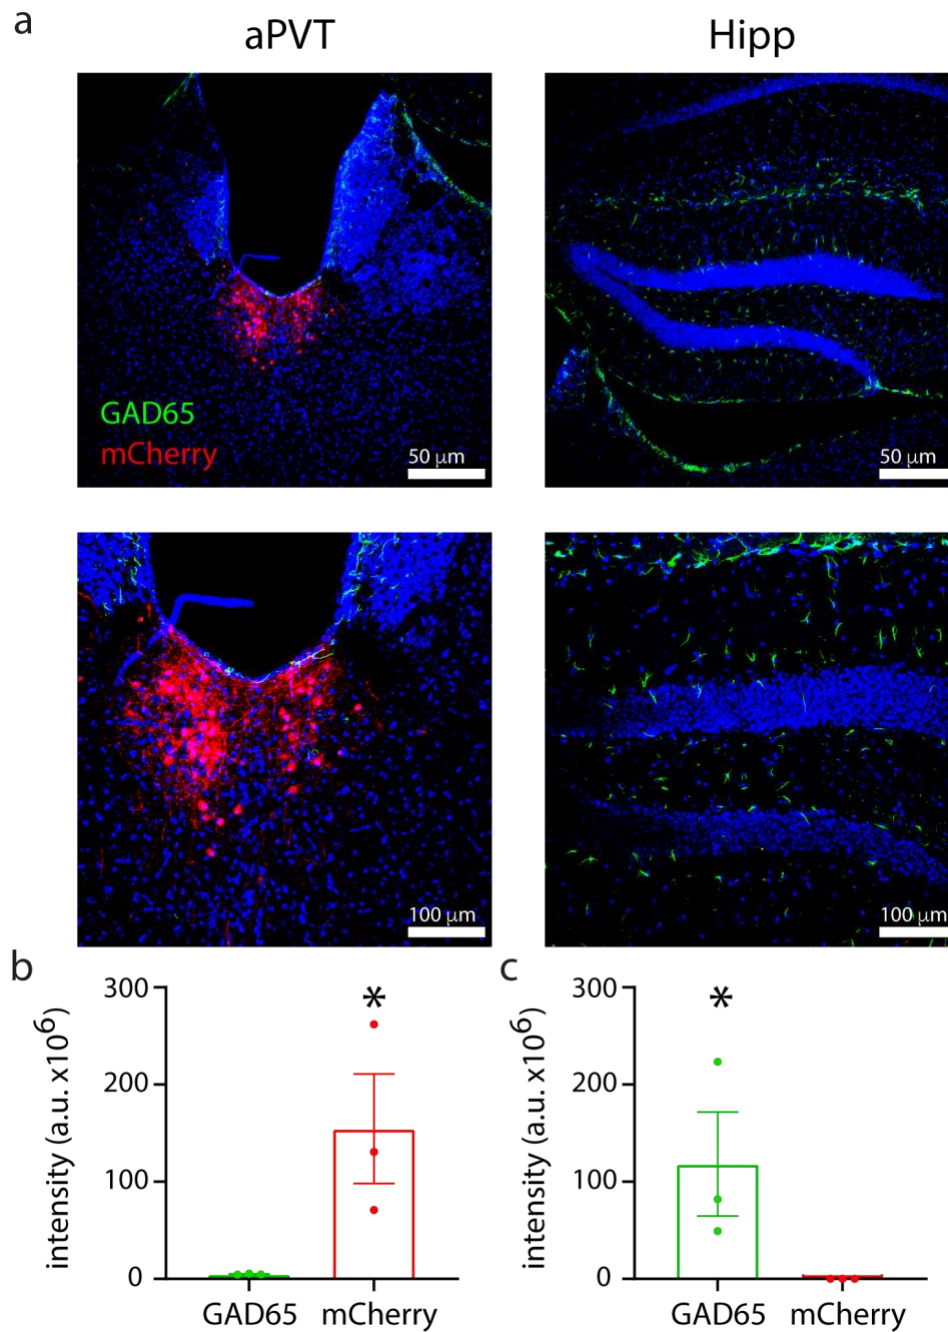

**Supplementary Figure 7. NAc projecting PVT neurons are not GABAergic.**

**a**, Representative images of GAD65 (green) and mCherry (red) (top 10x; bottom 20x) expression patterns in the aPVT and hippocampus (Hipp). **b**, **c** Quantification GAD65 and mCherry fluorescence in the aPVT (**b**:  $t = 2.33$ ,  $P < 0.01$ ,  $n = 3$  mice/group) and Hipp (**c**:  $t = 2.21$ ,  $P < 0.05$ ,  $n = 3$  mice/group) Statistical analysis of GAD65 versus mCherry expression for aPVT versus PFC (two-way ANOVA:  $F_{1,8} = 10.2$ ,  $P < 0.05$ ,  $n = 3$  mice/group). Data are mean  $\pm$  s.e.m. Source data are provided as a Source Data file.

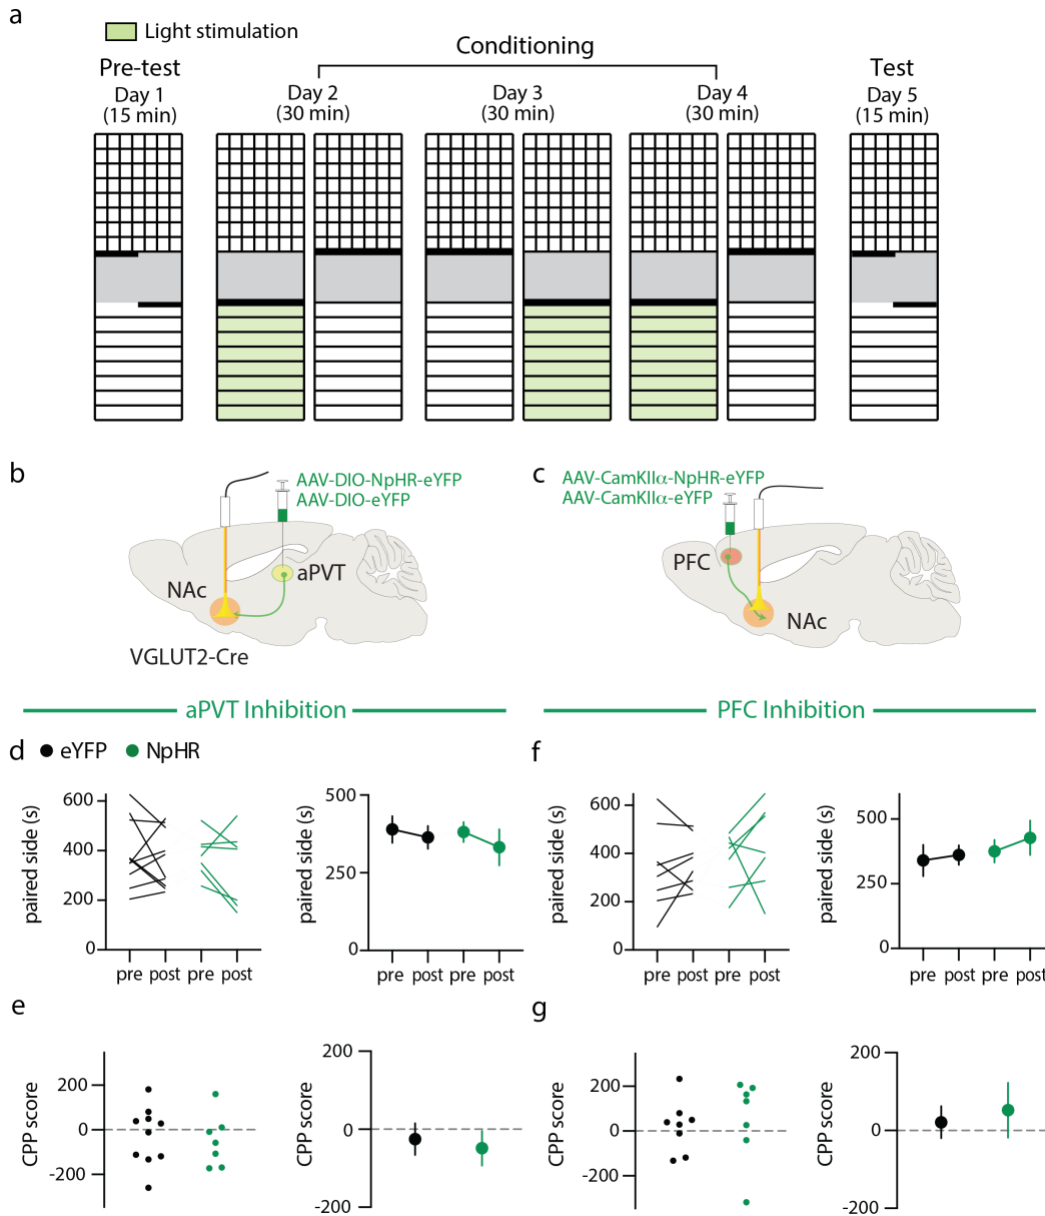

**Supplementary Figure 8. Inhibition of distinct NAc glutamatergic inputs does not induce conditioned place preference or aversion.**

**a**, Schematic of experimental setup and design. **b**, Schematic of viral injection and ferrule implant for aPVT input inhibition. **c**, Schematic of viral injection and ferrule implant for PFC input inhibition. **d**, **e**, Quantification of time spent in the paired chamber (**d**:  $n = 10,7$  mice/group) and CPP score for paired chamber (**e**:  $n = 10,7$  mice/group) in eYFP control (black) and NpHR expressing (green) mice. **f**, **g**, Quantification of time spent in paired chamber (**f**:  $n = 8,7$  mice/group) and CPP score for paired chamber (**g**:  $n = 8,7$  mice/group) in eYFP control (black) and NpHR expressing (green) mice. Data are mean  $\pm$  s.e.m. (**d**, **f**) two-way ANOVA with Sidak's multiple comparison post hoc test, (**e**, **g**) student's t-test 2-tailed. Source data are provided as a Source Data file.



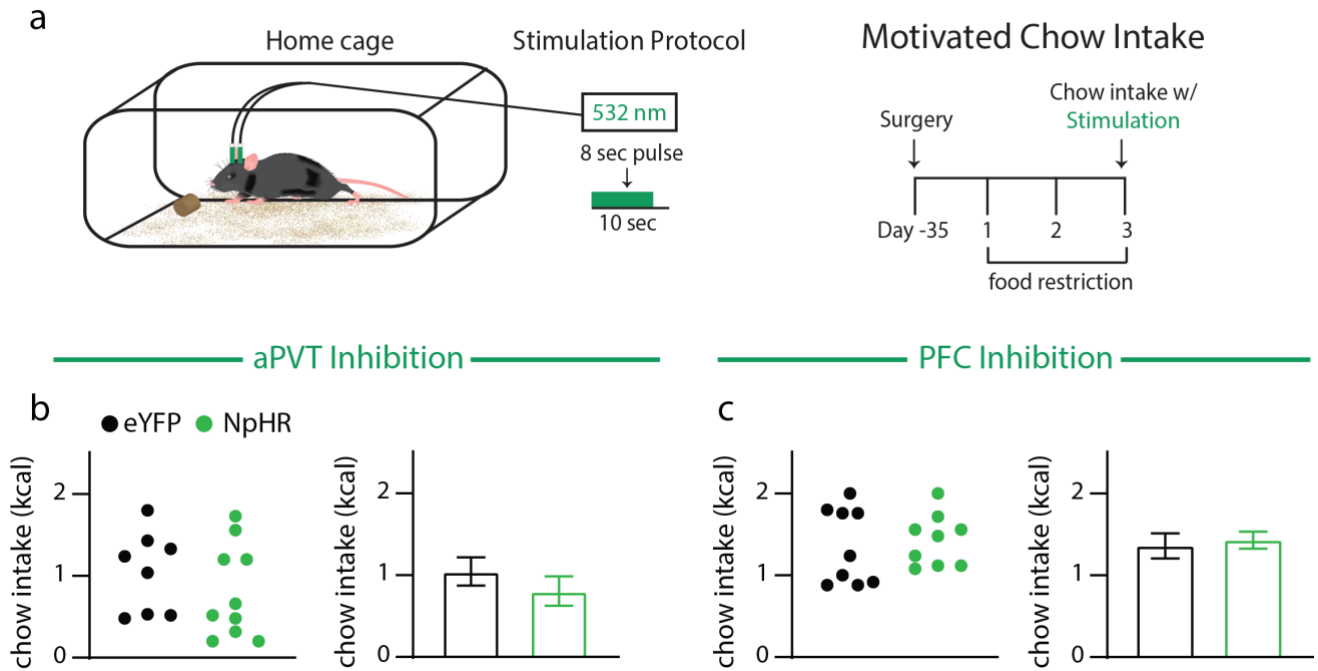

**Supplementary Figure 9. Inhibition of distinct NAc glutamatergic inputs does not affect motivated chow intake.**

**a**, Schematic of experimental setup (left); experimental timeline (right). **b**, **c**, Quantification of chow intake following food deprivation (**b**:  $n = 8, 10$  mice/group; **c**:  $n = 9$  mice/group) in eYFP control (black), aPVT (**b**) and PFC (**c**) NpHR expressing (green) mice. Student's t-test 2-tailed. Data are mean  $\pm$  s.e.m. Source data are provided as a Source Data file.

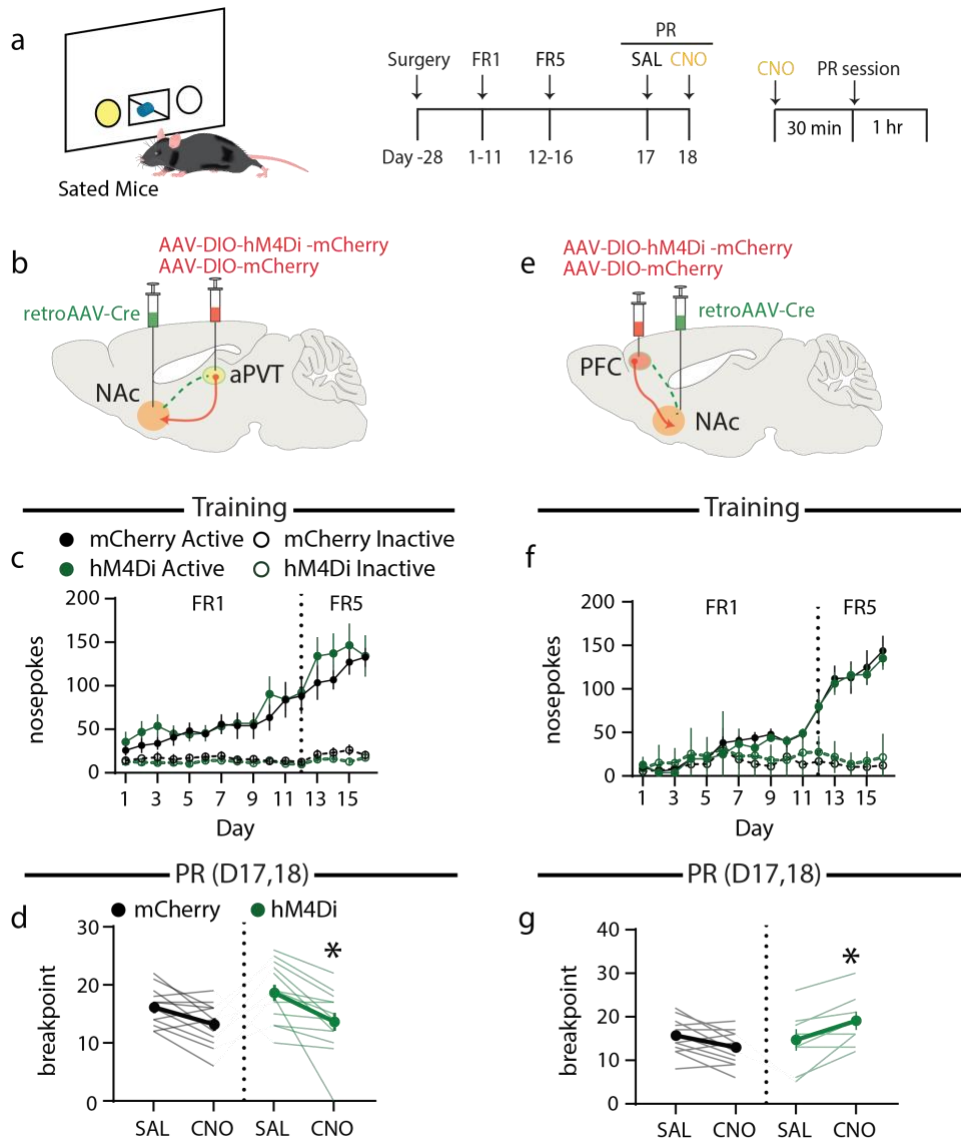

**Supplementary Figure 10. Inhibition of distinct NAc projection neurons selectively regulates motivation for high fat.**

**a**, Schematic of experimental setup (left); experimental timeline (right). **b**, Schematic of viral injection for NAc projecting aPVT neuron inhibition. **c**, Quantification of training demonstrating sated mice will nosepoke for high fat pellet: mCherry control (black) and hM4Di expressing (green) mice. **d**, Quantification of breakpoint (**d**:  $F_{1,23} = 20.5$ ,  $P = 0.0002$ , **c,d**:  $n = 12,13$  mice/group) in mCherry control (black) and hM4Di expressing (green) mice. **e**, Schematic of viral injection for NAc projecting PFC neuron inhibition. **f**, Quantification of training demonstrating sated mice will nosepoke for high fat pellet: mCherry control (black) and hM4Di expressing (green) mice. **g**, Quantification of breakpoint (**g**:  $F_{1,18} = 17.8$ ,  $P = 0.0005$ , **f,g**:  $n = 12,8$  mice/group) in mCherry control (black) and hM4Di expressing (green) mice. Data are mean  $\pm$  s.e.m. \* $P < 0.05$ , two-way ANOVA with Sidak's multiple comparison post hoc test. Source data are provided as a Source Data file.

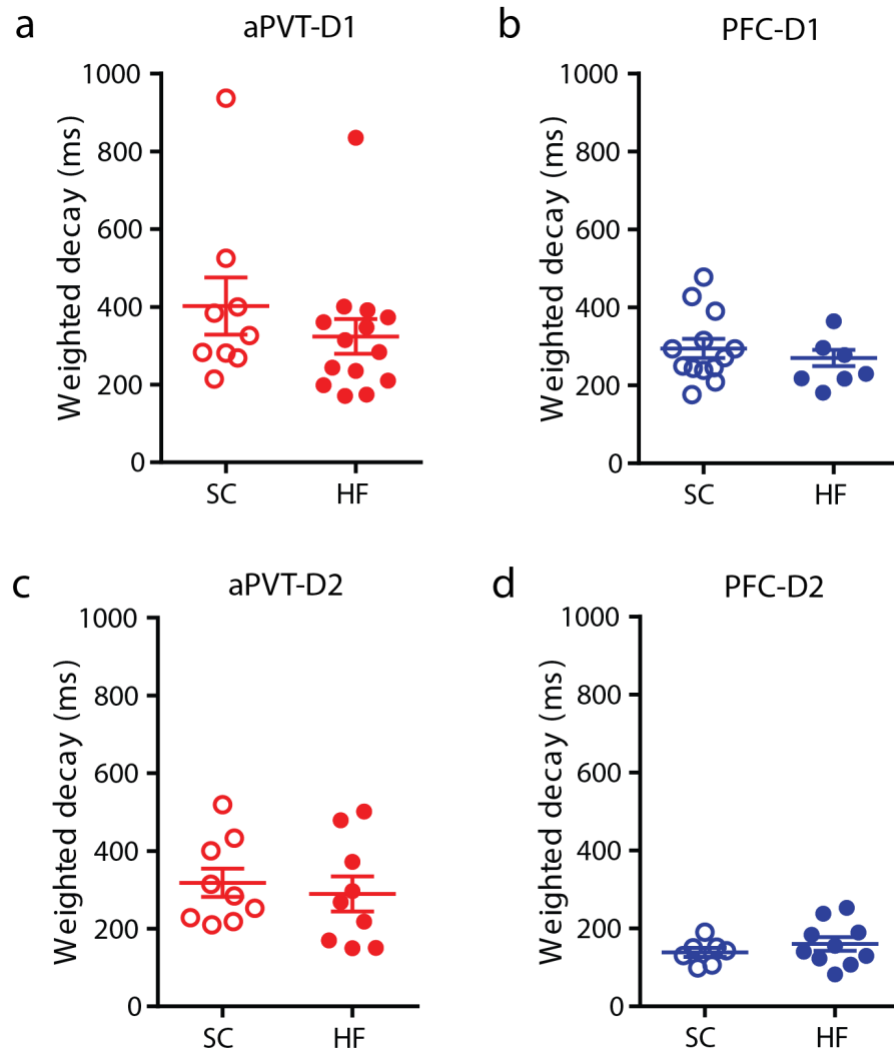

**Supplementary Figure 11. High fat intake does not alter the decay kinetics of NMDAR EPSCs.**

Quantification of NMDAR EPSC weighted decay in D1 MSNs for **a**, aPVT (n = 9,14 cells/group, red) and **b**, PFC n = 13 cells/group, blue) inputs. Quantification of NMDAR EPSC weighted decay in D2 MSNs for **c**, aPVT (n = 9 cells/group, red) and **d**, PFC (n = 7,10 cells/group, blue) inputs. Data are mean  $\pm$  s.e.m. Student's t-test, 2-tailed. Source data are provided as a Source Data file.

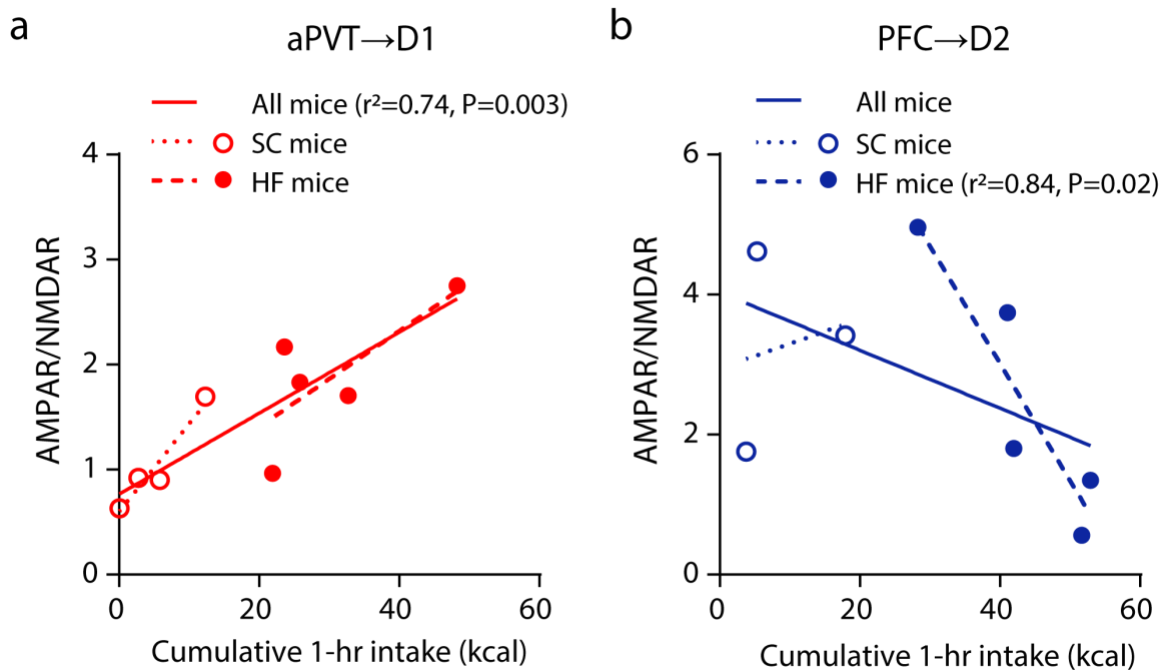

**Supplementary Figure 12. Changes in synaptic strength correlate with cumulative intake.**

**a**, Linear regression analysis revealing a significant correlation of the AMPAR/NMDAR ratio at aPVT→D1 MSN synapses with cumulative intake of chow and high fat during 1-hr exposure ( $r^2=0.74$ ,  $P=0.003$ ). **b**, Linear regression analysis revealing a significant inverse correlation of the AMPAR/NMDAR ratio at PFC→D2 MSN synapses with cumulative intake of high fat during 1-hr exposure ( $r^2=0.84$ ,  $P=0.02$ ). Source data are provided as a Source Data file.

PFC NAc oLTD

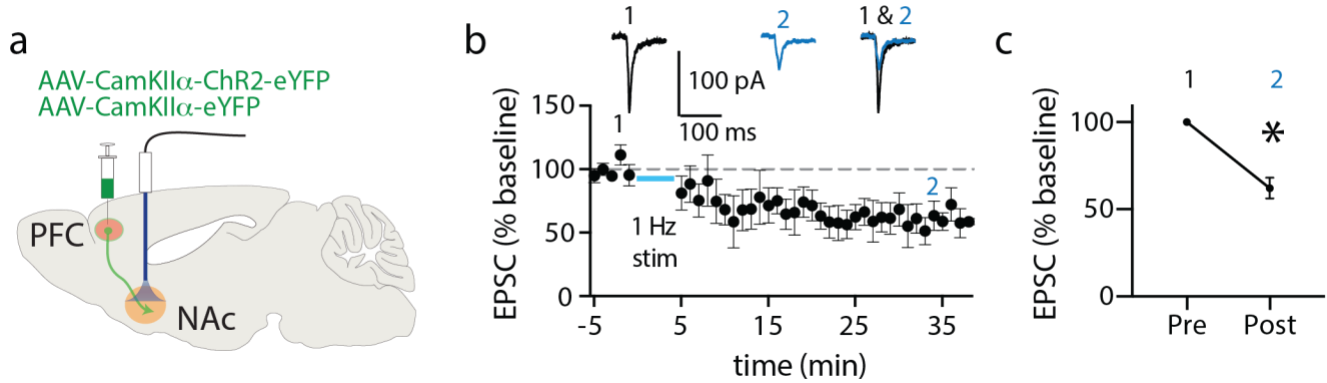

**Supplementary Figure 13. Induction of LTD at PFC→NAc synapses.**

**a**, Schematic of viral infection and ferrule implant for PFC input stimulation. **b**, Summary time course and representative traces of EPSC amplitude demonstrating optically induced depression of PFC→NAc synapses. **c**, Quantification of EPSC amplitude pre- and post-LTD induction protocol (**c**:  $t = 6.40$ ,  $P = 0.007$ , **b,c**:  $n = 4$  cells). Student's t-test 2-tailed. Data are mean  $\pm$  s.e.m. \* $P < 0.05$ , student's t-test. Source data are provided as a Source Data file.
